# Supplementary material for: Dynamics of diffusive cell signaling relays
Source: eLife journal article supplement (doi:10.7554/elife.61771), 2020-12-04
Supplement: supp [file elife-61771-supp-v1.zip]

Archive with 1 entries (1 files):
- elife_poa_e61771_Transparent_Reporting_File.pdf
